# Supplementary material
Source: publisher figshare collection journal article supplement (https://acs.figshare.com/ndownloader/files/22236216)
Supplement: Supplementary file 1 [file 22236216]

# Supporting Information

## Enhanced Synergistic Antibacterial Activity through a Smart Platform Based on UiO-66 Combined with Photodynamic Therapy and Chemotherapy

*Huihui Lv, Yunting Zhang, Pan Chen, Jinping Xue, Xiao Jia\*, Juanjuan Chen\**

National & Local Joint Biomedical Engineering Research Center on Photodynamic Technologies, College of Chemistry, Fuzhou University, 2 Garden Road, Fuzhou 350116, Fujian Province, P. R. China.

\*Email: [chenjuanjuan@fzu.edu.cn](mailto:chenjuanjuan@fzu.edu.cn)

\*Email: [jiaxiao@fzu.edu.cn](mailto:jiaxiao@fzu.edu.cn)

Number of Pages: 8

Number of Schemes: 2

Number of Figures: 6

Number of Tables: 2

Number of Formulas: 2

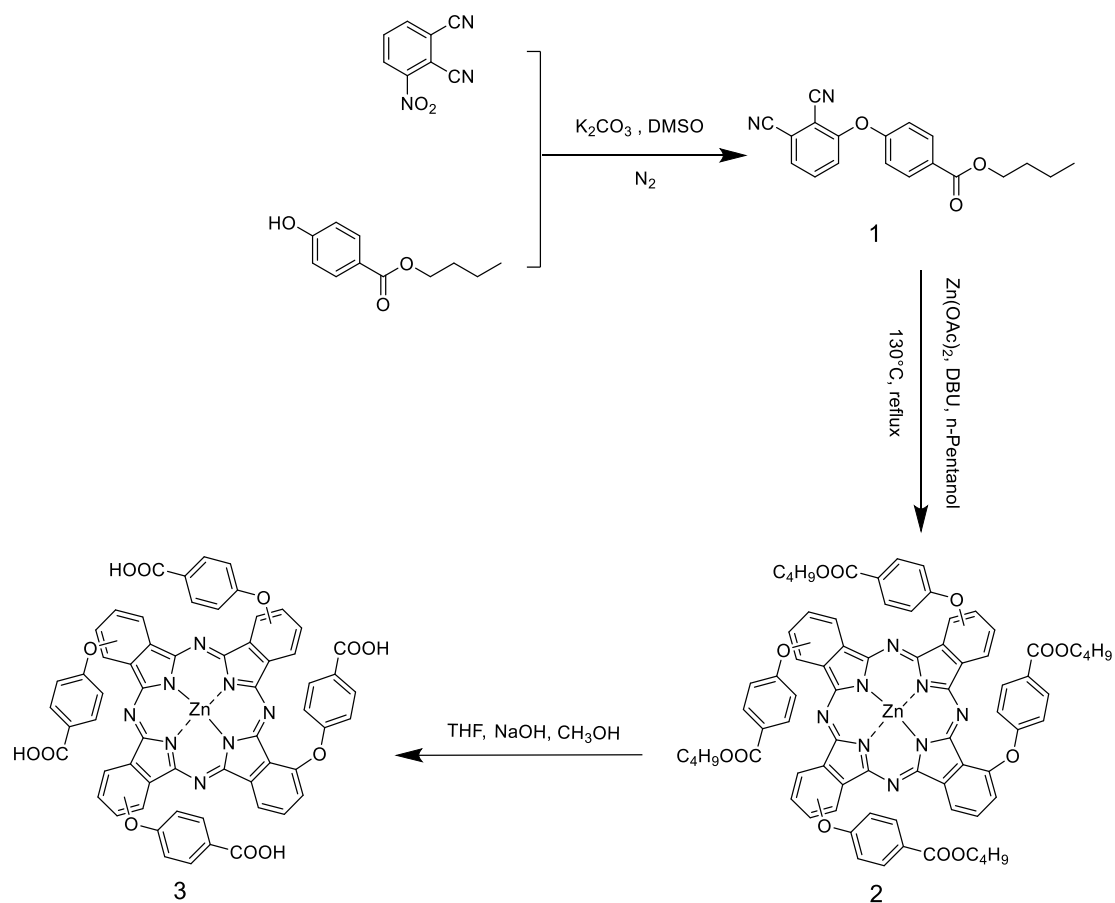

**Scheme S1.** The synthetic procedure of **3**.

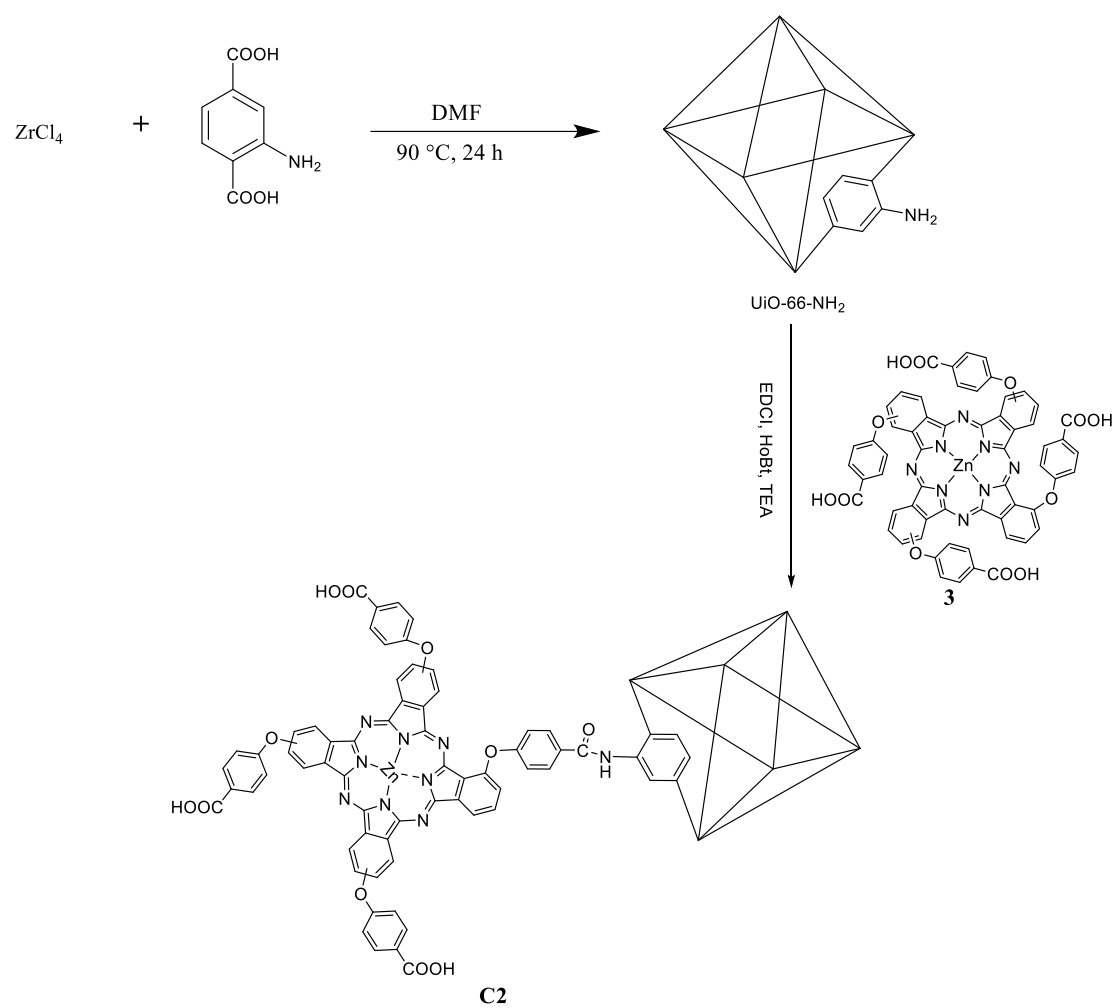

**Scheme S2.** The synthetic procedure of **C2**.

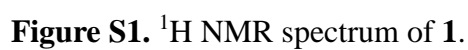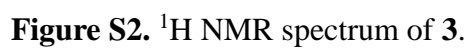

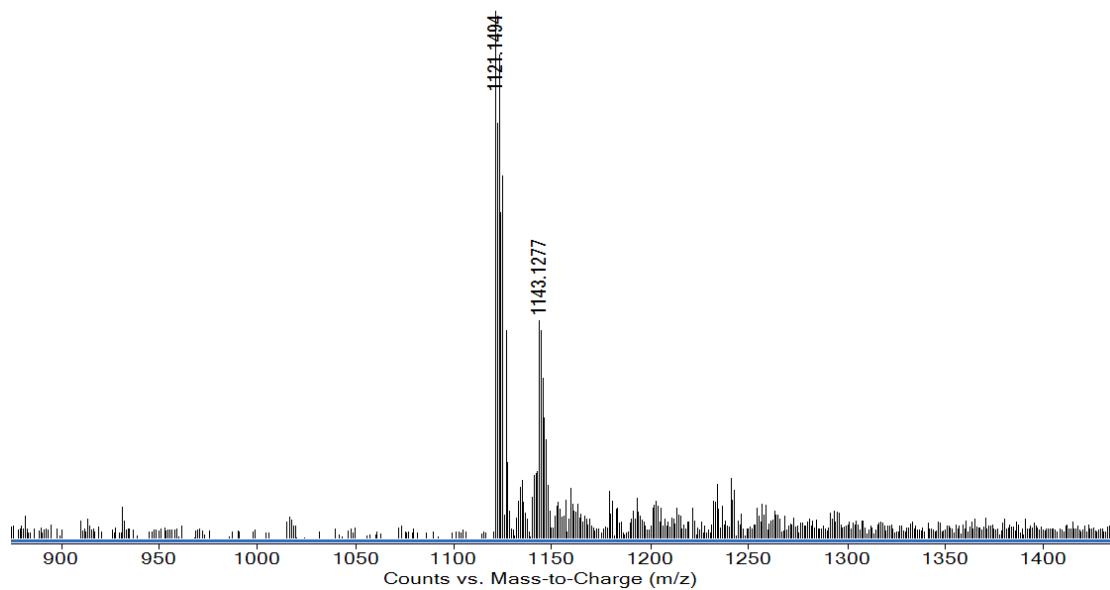

**Figure S3.** HRMS spectrum of **3** ( $M/z[M+H^+]$ ).

**Table S1.** ICP-OES data of the  $Zn^{2+}$  concentration in **C4** (4 mg **C4** dissolved in 10 mL acid).

| Run                     | Zn 213.856<br>{458}<br>(Radial) | Zn 206.200<br>{464}<br>(Radial) |
|-------------------------|---------------------------------|---------------------------------|
| Concentration per Run 1 | 0.412 ppm                       | 0.414 ppm                       |
| Concentration per Run 2 | 0.417 ppm                       | 0.417 ppm                       |
| Concentration per Run 3 | 0.413 ppm                       | 0.414 ppm                       |
| Concentration average   | 0.414 ppm                       | 0.415 ppm                       |
| Concentration RSD       | 0.6 %                           | 0.4 %                           |

$$\text{Encapsulating efficiency (\%)} = \frac{\text{the mass of linezolid in C3}}{\text{total mass of linezolid}} \times 100\% = 47.6\%$$

(1)

$$\text{Drug loading rate (\%)} = \frac{\text{the mass of linezolid in C3}}{\text{total mass of C3}} \times 100\% = 50.8\%$$

(2)

**Table S2.** Singlet oxygen quantum yield of **ZnPc**, **3**, **C2** and **C3**.

| Compound  | $\Phi_{\Delta}$ |
|-----------|-----------------|
| ZnPc      | 0.56            |
| <b>3</b>  | 0.50            |
| <b>C2</b> | 0.52            |
| <b>C3</b> | 0.51            |

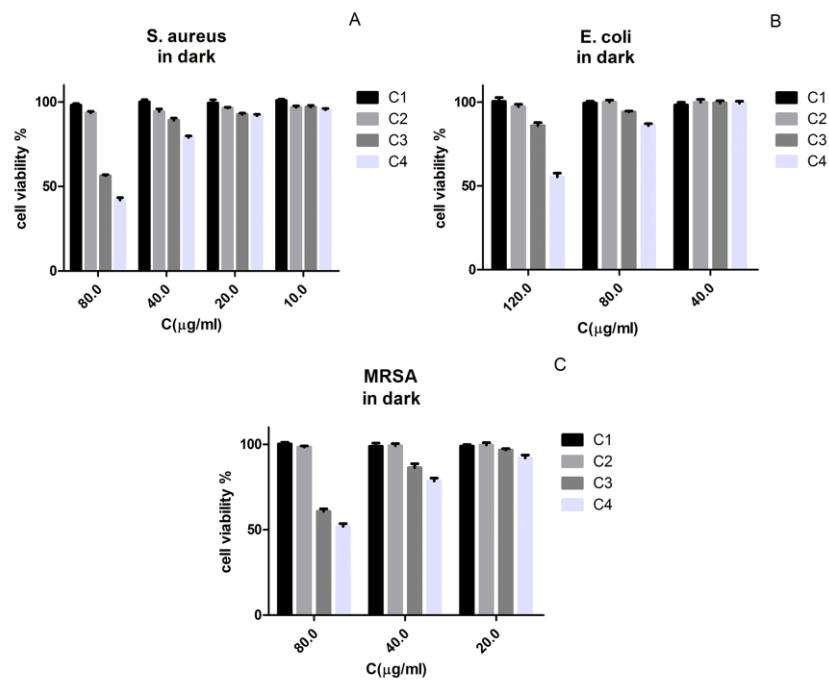

**Figure S4.** The antibacterial effect of C1, C2, C3 and C4 against *S. aureus*, *E. coli* and MRSA in dark at different concentrations

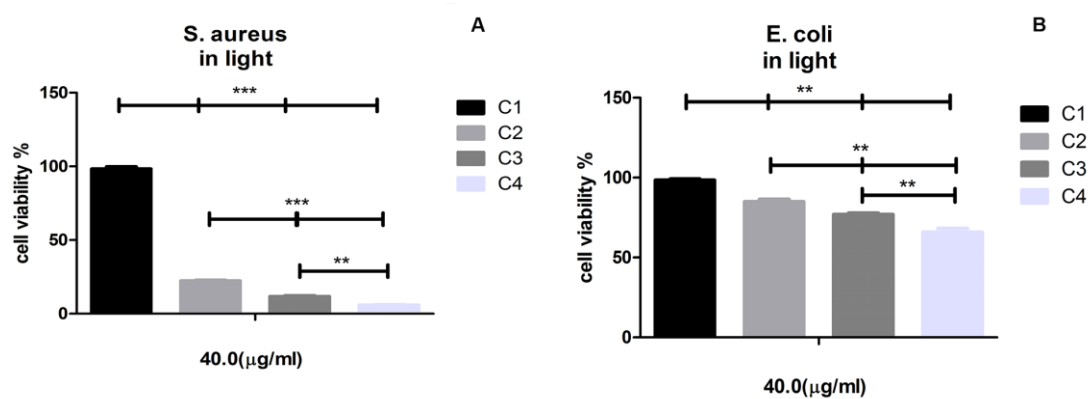

**Figure S5.** The antibacterial effects of **C1**, **C2**, **C3** and **C4** against *S. aureus* and *E. coli* under light illumination at 40 µg/mL (\*\*P < 0.01, \*\*\*P < 0.005).

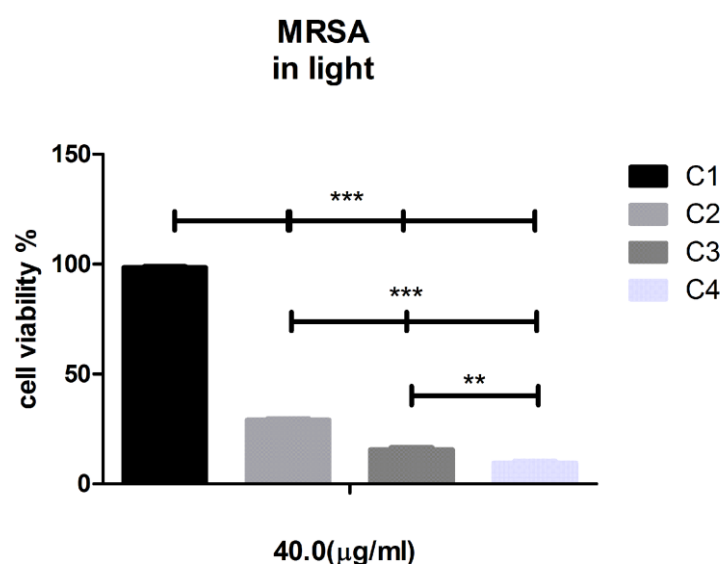

**Figure S6.** The antibacterial effects of **C1**, **C2**, **C3** and **C4** against MRSA under light illumination at 40 µg/mL (\*\*P < 0.01, \*\*\*P < 0.005).
